# Supplementary material for: Assessing the Organizational Readiness in Using Unstructured Supplementary Service Data (USSD) to Improve Treatment Outcomes for Adolescents Living with HIV Transitioning to Adult Care at Umodzi Family ART Clinic
Source: Research Square preprint supplement (doi:10.21203/rs.3.rs-6669133/v1), 2025-06-18
Supplement: Supplementary file 1 [file 53356ba9262dfeb79232eeea.docx]

# Appendix 2

Focus Group Discussion Guide for ALHIV

Participants Identification:

# Section A: Introduction

Your facility has been providing support to adolescents on ART through the teen club program; some of these adolescents are transitioning to adult care, to continue providing support to them. We would like to assess the readiness of the facility to use the Unstructured supplementary service data (USSD) application to continue supporting them to improve treatment outcomes. A USSD-based application uses provider-based prompting through SMS and user-based prompting through accessing a unique USSD code. This service is like Mpamba and Airtel money services.

We will provide a unique code that links the client’s mobile number to their ART number. Through password-protected logging into the USSD platform, a menu with key themes will appear to prompt engagement with the user.

Some of the areas that will appear on the drop-down menu are

1. Adherence – Under this theme key messaging on adherence will be accessed, next appointment dates will be displayed for the user.
2. Viral Load Monitoring – Key messages on VL Monitoring, treatment failure and routine VL monitoring milestones will be generated with the next appointed dates for VL testing listed
3. Opportunistic infections – Key messages on common symptoms of opportunistic infections will be generated, with common symptoms and treatment options
4. Psychosocial Support – key messages on psychosocial challenges will be generated and the avenues for support will also be listed
5. Linkage and referrals – key links to support services will be listed.

A toll-free number will be listed on the drop-down list on each theme to provide an option to speak to a health provider for further information and engagement

# Section B: Delivery

1. To get us started, in general, how would you describe the support that you have been getting at the teen club?
2. What are some of the challenges that you have faced in your treatment? And how has the teen club assisted you with these challenges?
3. You have been earmarked to transition to adult ART care, what are you feeling?
4. Do you think you will get the same support as offered at the teen club?
5. What do you think are the challenges you may face after the transition?
   1. Probe for treatment outcomes support:
      - Viral Load monitoring
      - Adherence
      - Psychosocial support
      - Other elements
      - Fourth dose
   2. How do think these challenges will be addressed by the facility post-teen club
      - Probe for solutions for specific challenges
6. Do you think it is important for you to continue getting support from the facility?
7. As explained earlier, we plan to introduce a mobile service to support ALHIV transitioning to adult care. The application is like the Mpamba, Airtel Money application.
8. Are you aware of such applications and have you used them before?

***Yes*** → In what context used them?

- - Do you think such platforms provide useful information?

1. Do you think the areas (refer to the description of the intervention in the warmup) that are being proposed for the interventions are important for your treatment and care as you transition to adult care?

**Yes** → Please tell me more? Anything else?

**No** → Please tell me why? Anything else?

1. Do you think the intervention will assist you?

**Yes** → how?

**No-** Why

1. Are you willing to adopt the intervention of your treatment support?

***Yes*** → how?

***No-*** *Why*

1. The application will require access to a mobile phone. Do you have access to a mobile phone?

**Yes,** Is it a personal mobile phone?

**No,** do you share it with a guardian or a relative? If you share, how often do you have access to the phone?

1. What challenges do you see in using the application to support your treatment outcomes?
2. What possible solutions would you propose to these challenges

# Section C: Wrap-up Questions & Closure

1. What else would you suggest in making the application helpful to you?
2. Is there anything else you would like to share with me today?
