# Supplementary material for: Assessing the Organizational Readiness in Using Unstructured Supplementary Service Data (USSD) to Improve Treatment Outcomes for Adolescents Living with HIV Transitioning to Adult Care at Umodzi Family ART Clinic
Source: Research Square preprint supplement (doi:10.21203/rs.3.rs-6669133/v1), 2025-06-18
Supplement: Supplementary file 2 [file 7694d230f0994fb33baf040c.docx]

# Appendix 1

Health Care Worker IDI Guide Participant Identification: Participant Identification:

# Section A: Introduction

Your facility has been providing support to adolescents on ART through the teen club program, some of these adolescents are transitioning to adult care to continue providing support to them. We would like to assess the readiness of the facility to use the Unstructured supplementary service data (USSD) application to continue supporting them to improve treatment outcomes. A USSD-based application uses provider-based prompting through SMS and user-based prompting through accessing a unique USSD code. This service is like Mpamba and Airtel money services.

We will provide a unique code that links the client’s mobile number to their ART number. Through password-protected logging into the USSD platform, a menu with key themes will appear to prompt engagement with the user.

Some of the areas that will appear on the drop-down menu are.

1. Adherence – Under this theme key messaging on adherence will be accessed, next appointment dates will be displayed for the user.
2. Viral Load Monitoring – Key messages on VL Monitoring, treatment failure and routine VL monitoring milestones will be generated with the next appointed dates for VL testing listed.
3. Opportunistic infections – Key messages on common symptoms of opportunistic infections will be generated, with common symptoms and treatment options.
4. Psychosocial Support – key messages on psychosocial challenges will be generated and the avenues for support will also be listed.
5. Linkage and referrals – key links to support services will be listed.

A toll-free number will be listed on the drop-down list on each theme to provide an option to speak to a health provider for further information and engagement.

# Section B: Delivery

1. To get us started, in general, how would you describe the support that is given to adolescents who have transitioned to adult care as compared to those in the teen club?
   1. Probe on information support
   2. Probe on reassurance
   3. Probe on anxiety secondary to changing providers and settings
2. What do you think are the challenges being faced by these transitioned adolescents?
   1. Probe for treatment outcomes support:
      - Viral Load monitoring
      - Adherence
      - Psychosocial support
      - Other elements
      - Change in providers.
      - Nature of service provision (organisation of services)
   2. How have these challenges been addressed in your facility?
      - Probe for solutions for specific challenges
3. Explain to me if it is important to continue engagement with ALHIV transitioning to adult care to address some of the challenges they face?

- Explore as many reasons as possible.
- If not, explore the reasons as well.

1. As explained earlier, we plan to introduce a mobile service to support ALHIV transitioning to adult care. The application is like the Mpamba, Airtel Money application.

The application will provide information on

- 1. Are you aware of such applications and have you used them before?

***Yes*** → In what context used them?

- 1. Explain to me the usefulness of such platforms in providing useful information? If they are not useful, why do you think so?

1. Explain to me in detail what you think about the areas (refer to the description of the intervention in the warmup) that are being proposed for the interventions.
   1. Discuss in detail the importance of the interventions to treatment and care for transitioning to adult care?

**Yes** → Please tell me more? Anything else?

**No** → Please tell me why? Anything else?

1. Describe how the intervention will assist you in your work?

***Yes*** → how?

**No-** Why

1. Explain your willingness to adopt the intervention as part of your routine care?

**Yes** → how?

**No-** Why

# Section C: Resources

I would now like to change the subject and concentrate on resource needs. The application will require funds and other resources for its development, operation and maintenance.

1. Describe to me the capacity of this facility to provide resources for the application?

# Probe

- 1. for server space and ICT Platforms
  2. a dedicated hotline with responsible personnel to manage it
  3. IT personnel to manage the application
  4. The capacity of the staff to use the application
  5. Financial resources to launch and maintain the application

1. Another important area for the success of the application is policy.
   1. Does the facility have policies that support Digital/Mobile Health applications?
      - If yes, describe to me or show me the policy
      - if no, why not?
   2. How is Digital/Mobile Health incorporated into the strategic direction of the facility?
   3. Are there any national policies that support Digital/Mobile Health?
      - If yes, describe or show me those policies
2. We are aware that the facility has implemented Digital Health Applications in the past.

- What have been the major successes?
- What challenges have you faced?
- And how have you resolved these challenges

# Section C: Wrap-up Questions & Closure

1. What else would you suggest in making the application helpful to you and the adolescents?
2. Is there anything else you would like to share with me today?
